# Supplementary material
Source: PubMed Central journal article supplement (PMC10314953)
Supplement: NIHMS1863222-supplement-Supp1.pdf [file NIHMS1863222-supplement-Supp1.pdf]

**Table S1.** Constituents of e-Cigarette Solutions

| Flavor     | Nicotine formulations | Nicotine Concentration (mg/mL) | Density (g/mL) | PG/VG Ratio | pH   |
|------------|-----------------------|--------------------------------|----------------|-------------|------|
| Tobacco    | Free-base             | 29.42                          | 1.16           | 60:40       | 8.30 |
|            | 50% Lactic            | 27.78                          | 1.18           | 60:40       | 7.36 |
|            | 100% Lactic           | 29.00                          | 1.18           | 60:40       | 5.09 |
|            | 50% Benzoic           | 29.63                          | 1.18           | 60:40       | 7.31 |
|            | 100% Benzoic          | 29.14                          | 1.18           | 60:40       | 4.83 |
| Caramel    | Free-base             | 27.66                          | 1.15           | 55:45       | 7.88 |
|            | 50% Lactic            | 29.47                          | 1.15           | 55:45       | 6.86 |
|            | 100% Lactic           | 29.26                          | 1.15           | 55:45       | 4.47 |
|            | 50% Benzoic           | 28.41                          | 1.15           | 60:40       | 6.26 |
|            | 100% Benzoic          | 33.02                          | 1.16           | 55:45       | 4.54 |
| Grape ice  | Free-base             | 28.22                          | 1.15           | 70:30       | 8.27 |
|            | 50% Lactic            | 30.03                          | 1.15           | 70:30       | 7.70 |
|            | 100% Lactic           | 28.97                          | 1.15           | 70:30       | 5.26 |
|            | 50% Benzoic           | 27.02                          | 1.14           | 70:30       | 7.43 |
|            | 100% Benzoic          | 28.67                          | 1.16           | 70:30       | 5.01 |
| Strawberry | Free-base             | 28.49                          | 1.13           | 60:40       | 8.39 |
|            | 50% Lactic            | 28.76                          | 1.13           | 60:40       | 7.42 |
|            | 100% Lactic           | 27.75                          | 1.14           | 65:35       | 5.04 |
|            | 50% Benzoic           | 27.68                          | 1.13           | 65:35       | 7.19 |
|            | 100% Benzoic          | 28.45                          | 1.14           | 60:40       | 4.82 |

*Note.* Differences of mean values of nicotine concentration ( $F = 1.01$ ,  $p = 0.43$ ), density ( $F = 0.29$ ,  $p = 0.88$ ), and PG/VG ( $F = 0.10$ ,  $p = 0.88$ ) by nicotine formulation were statistically non-significant. There was significant pH mean difference by nicotine formulation ( $F = 74.63$ ,  $p < 0.001$ ).

**Table S2.** Interaction Effects of pH × Acid Type on Appeal and Sensory Attributes

|                                 | Interaction, $\beta$ (95% CI) | <i>p</i> -value |
|---------------------------------|-------------------------------|-----------------|
| <i>Liking</i>                   | 1.07 (-0.87, 3.01)            | .280            |
| <i>Disliking</i>                | -1.66 (-3.74, 0.42)           | .118            |
| <i>Willingness to use again</i> | 1.10 (-1.04, 3.25)            | .312            |
| <i>Sweetness</i>                | -0.87 (-2.76, 1.01)           | .363            |
| <i>Smoothness</i>               | 0.71 (-1.23, 2.65)            | .473            |
| <i>Bitterness</i>               | -0.69 (-2.45, 1.08)           | .445            |
| <i>Harshness</i>                | -1.03 (-3.03, 0.97)           | .314            |

*Note.* Estimates are the interactive effects adjusting for the main effects and flavor. Free-base solutions were excluded. The remaining 50% and 100% nicotine benzoate and 50% and 100% nicotine lactate solutions were included to examine the interaction effects between pH and acid type (benzoate vs. lactate) on study outcomes.

**Table S3.** Interactive effects of Study Nicotine Formulation with Tobacco Use Status and with Flavor on Appeal and Sensory Attributes

|                                                              | Appeal |          |           |          |                          |          | Sensory attributes |          |            |          |            |          |           |          |
|--------------------------------------------------------------|--------|----------|-----------|----------|--------------------------|----------|--------------------|----------|------------|----------|------------|----------|-----------|----------|
|                                                              | Liking |          | Disliking |          | Willingness to use again |          | Sweetness          |          | Smoothness |          | Bitterness |          | Harshness |          |
|                                                              | F      | <i>p</i> | F         | <i>p</i> | F                        | <i>p</i> | F                  | <i>p</i> | F          | <i>p</i> | F          | <i>p</i> | F         | <i>p</i> |
| Study nicotine formulation × Tobacco use status <sup>a</sup> |        |          |           |          |                          |          |                    |          |            |          |            |          |           |          |
| Lactic <sup>b</sup> × Tobacco use status                     | 0.7    | .749     | 0.3       | .371     | 0.3                      | .967     | 0.9                | .603     | 2.4        | .091     | 0.1        | .997     | 0.4       | .908     |
| Benzoic <sup>c</sup> × Tobacco use status                    | 0.7    | .712     | 1.3       | .371     | 1.5                      | .300     | 1.0                | .527     | 2.5        | .084     | 1.9        | .179     | 2.4       | .089     |
| Study nicotine formulation × Study Flavor                    |        |          |           |          |                          |          |                    |          |            |          |            |          |           |          |
| Lactic <sup>b</sup> × Flavor <sup>d</sup>                    | 0.6    | .748     | 0.6       | .721     | 1.2                      | .343     | 0.9                | .564     | 0.9        | .540     | 1.8        | .125     | 1.0       | .439     |
| Benzoic <sup>c</sup> × Flavor <sup>d</sup>                   | 1.2    | .354     | 1.6       | .195     | 2.2                      | .061     | 1.1                | .392     | 1.1        | .392     | 1.8        | .128     | 2.0       | .085     |

*Note.* Omnibus F test was used to calculate the estimates. P-values were corrected for multiple testing to control the false-discovery rate using the Benjamini-Hochberg procedure. *p* = p-value.

<sup>a</sup> Exclusive cigarette smoker, exclusive e-cigarette user, or dual use of cigarettes and e-cigarettes.

<sup>b</sup> Free-base vs. 50% nicotine lactate / 50% freebase vs. 100% nicotine lactate.

<sup>c</sup> Free-base vs. 50% nicotine benzoate / 50% freebase vs. 100% nicotine benzoate.

<sup>d</sup> Tobacco, caramel, grape ice, or strawberry.

**Table S4.** Interactive Effects of Study Nicotine Formulation with Current Nicotine Formulation Used in Own Device on Appeal and Sensory Attributes

|                                                                             | Appeal |          |           |          |                          |          | Sensory attributes |          |            |          |            |          |           |          |
|-----------------------------------------------------------------------------|--------|----------|-----------|----------|--------------------------|----------|--------------------|----------|------------|----------|------------|----------|-----------|----------|
|                                                                             | Liking |          | Disliking |          | Willingness to use again |          | Sweetness          |          | Smoothness |          | Bitterness |          | Harshness |          |
|                                                                             | F      | <i>p</i> | F         | <i>p</i> | F                        | <i>p</i> | F                  | <i>p</i> | F          | <i>p</i> | F          | <i>p</i> | F         | <i>p</i> |
| Study nicotine formulation × Current formulation in own device <sup>a</sup> |        |          |           |          |                          |          |                    |          |            |          |            |          |           |          |
| Lactic <sup>b</sup> × Current formulation                                   | 1.0    | .524     | 0.8       | .801     | 1.0                      | .524     | 0.7                | .705     | 1.4        | .374     | 1.1        | .524     | 1.0       | .524     |
| Benzoic <sup>c</sup> × Current formulation                                  | 0.9    | .567     | 1.0       | .524     | 1.3                      | .374     | 0.3                | .940     | 1.6        | .303     | 0.8        | .670     | 1.4       | .374     |

*Note.* Omnibus F test was used to calculate the estimates. P-values were corrected for multiple testing to control the false-discovery rate using the Benjamini-Hochberg procedure. *p* = p-value.

<sup>a</sup> Response options included salt, free-base, switch back and forth between salt and free-base, or do not know. Exclusive cigarette smokers were excluded (n = 31).

<sup>b</sup> Free-base vs. 50% nicotine lactate / 50% free-base vs. 100% nicotine lactate.

<sup>c</sup> Free-base vs. 50% nicotine benzoate / 50% free-base vs. 100% nicotine benzoate.

**Table S5.** Effects of Nicotine Formulation on Appeal and Sensory Attributes, Adjusting for PG/VG ratio

|                             | Estimates, $\beta$ (95% CI) |                         |                          |                      |                       |                          |                          |
|-----------------------------|-----------------------------|-------------------------|--------------------------|----------------------|-----------------------|--------------------------|--------------------------|
|                             | Appeal                      |                         |                          | Sensory attributes   |                       |                          |                          |
|                             | Liking                      | Disliking               | Willingness to use again | Sweetness            | Smoothness            | Bitterness               | Harshness                |
| <b>Formulation: Lactic</b>  |                             |                         |                          |                      |                       |                          |                          |
| 50% Lactic vs. Free-base    | 5.2*<br>(1.8, 8.6)          | -6.4*<br>(-10.2, -2.8)  | 6.1*<br>(2.4, 9.7)       | 6.1*<br>(2.6, 9.7)   | 11.4*<br>(8.0, 14.8)  | -8.2*<br>(-11.5, -4.9)   | -14.9*<br>(-18.4, -11.3) |
| 100% Lactic vs Free-base    | 9.3*<br>(6.5, 13.3)         | -13.1*<br>(-16.8, -9.4) | 10.5*<br>(6.9, 14.2)     | 7.5*<br>(4.0, 11.1)  | 17.5*<br>(14.1, 21.0) | -12.4*<br>(-15.7, -9.0)  | -21.1*<br>(-24.7, -17.5) |
| <b>Formulation: Benzoic</b> |                             |                         |                          |                      |                       |                          |                          |
| 50% Benzoic vs. Free-base   | 6.3*<br>(2.7, 9.9)          | -8.2*<br>(-12.0, -4.3)  | 6.4*<br>(2.6, 10.3)      | 5.1*<br>(1.6, 8.7)   | 14.2*<br>(10.7, 17.6) | -8.7*<br>(-12.1, -5.3)   | -17.1*<br>(-20.8, -13.4) |
| 100% Benzoic vs Free-base   | 10.7*<br>(7.1, 14.3)        | -12.6*<br>(-16.4, -8.8) | 10.2*<br>(6.4, 14.0)     | 10.6*<br>(7.0, 14.1) | 19.9*<br>(16.5, 23.3) | -13.6*<br>(-17.0, -10.2) | -22.9*<br>(-26.5, -19.2) |

*Note.* Estimates were adjusted for PG/VG ratio.

\* Statistically significant after Benjamini-Hochberg corrections for multiple testing to control the false-discovery rate at 0.05.

**Figure S1.** Study Flow Diagram

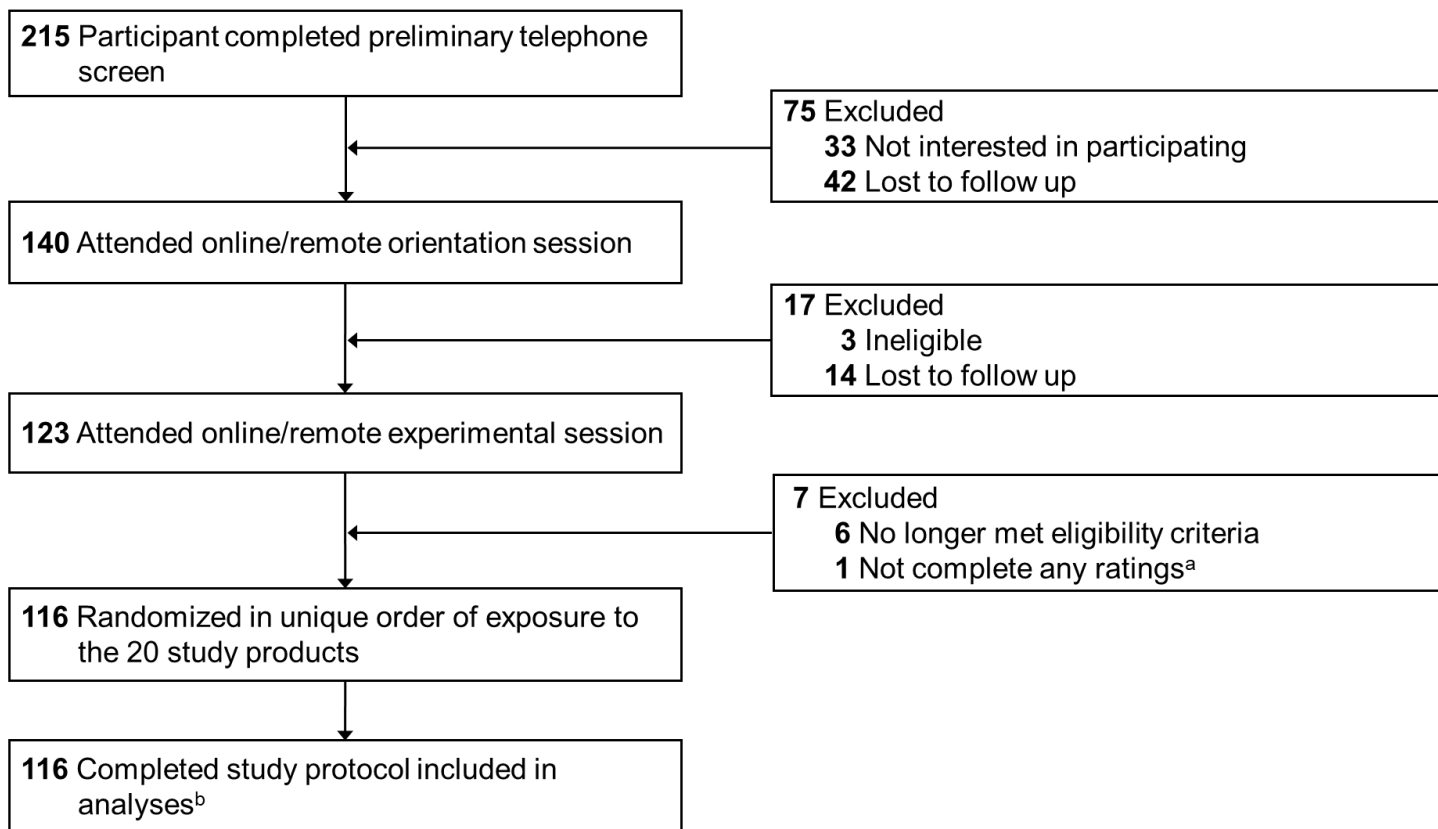

<sup>a</sup> Due to internet connection issue.

<sup>b</sup> Eleven participants with trial-level missing data (range, 1-19 trials).

**Figure S2.** Nonlinear Association of pH with Appeal and Sensory Attribute Ratings

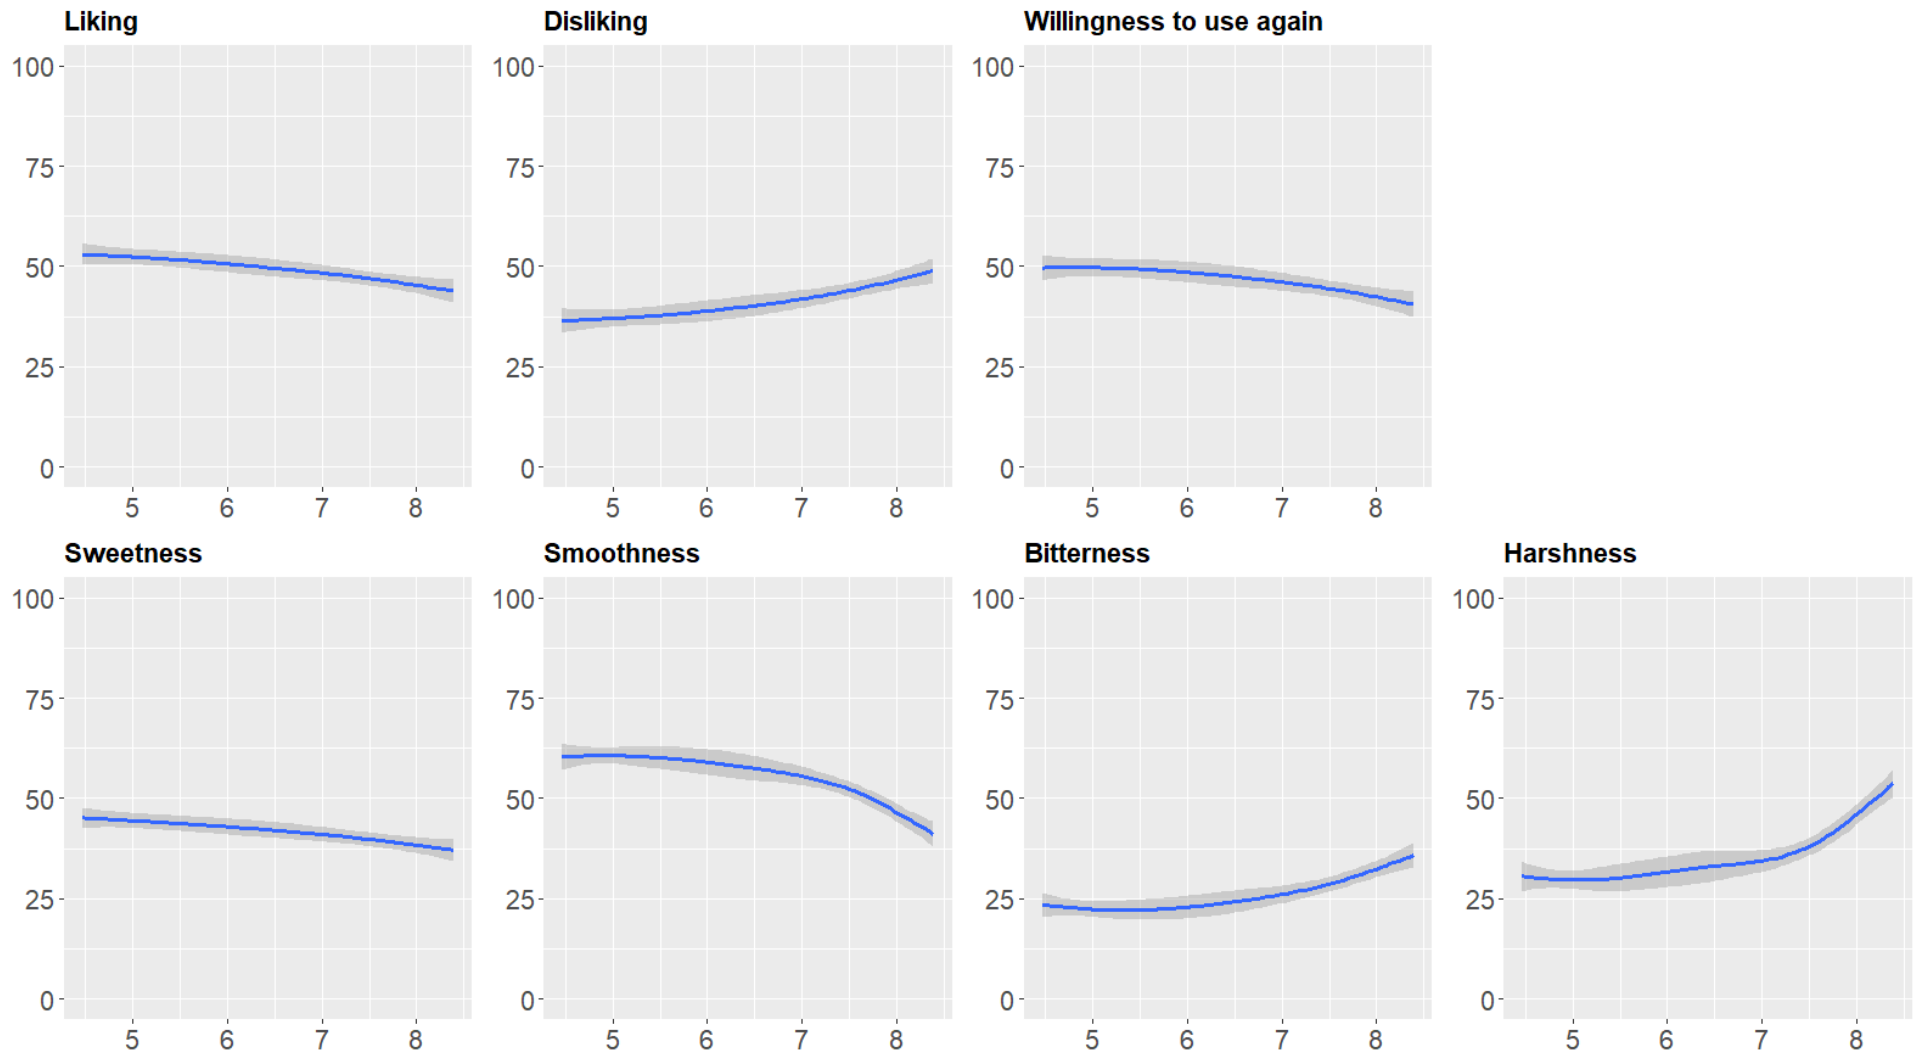

*Note.* Y-axis = rating (0-100). X-axis = pH level.
